# Supplementary material
Source: publisher figshare collection journal article supplement (https://acs.figshare.com/ndownloader/files/4528279)
Supplement: Supplementary file 1 [file 4528279]

# Malachite nanoparticle: a new basic hydrophilic surface for pH controlled adsorption of BSA with a high loading capacity

*Bedabrata Saha<sup>a</sup> and Gopal Das<sup>a,b\*</sup>*

<sup>a</sup> Centre for the Environment, Indian Institute of Technology Guwahati, Assam – 781039, India

<sup>b</sup> Department of Chemistry, Indian Institute of Technology Guwahati, Assam – 781039, India

E-mail: gdas@iitg.ernet.in; Tel: +91 361 2582313; Fax: +91 361 2582349

**Supporting information**

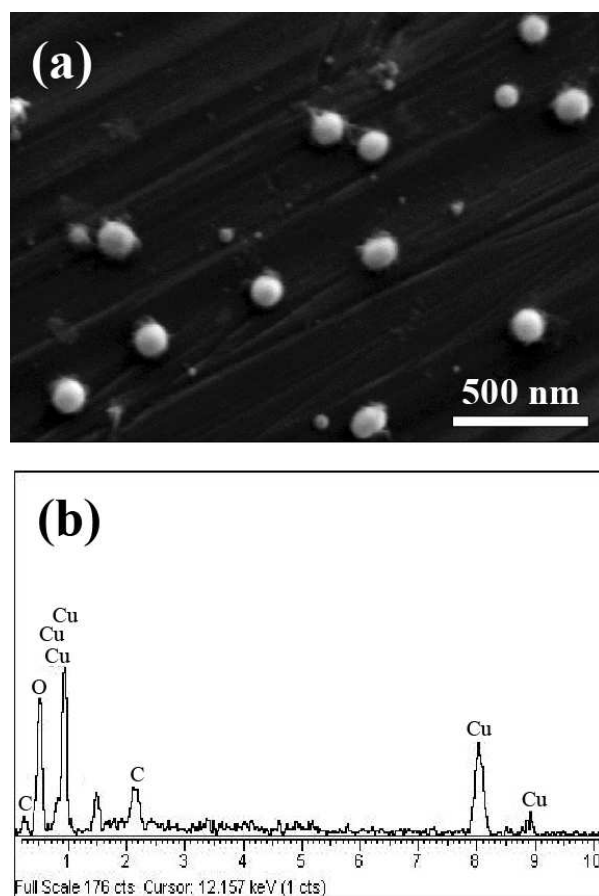

**Figure S1.** (a) SEM images of malachite NPs and (b) EDX spectra of malachite NPs showing the presence of Cu, C and O.

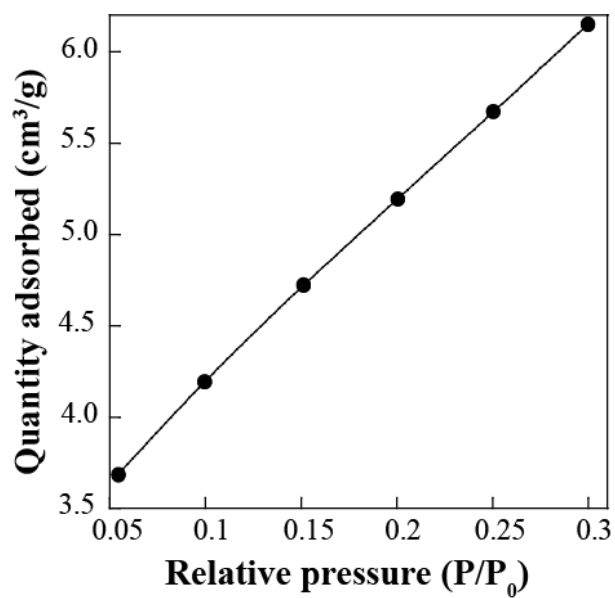

**Figure S2.** N<sub>2</sub> adsorption/desorption isotherms of malachite NPs measured from BET analysis.

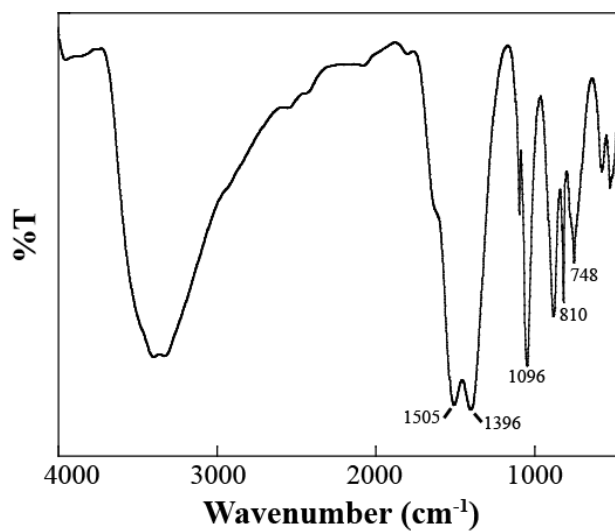

**Figure S3.** FT-IR spectra of malachite NPs.

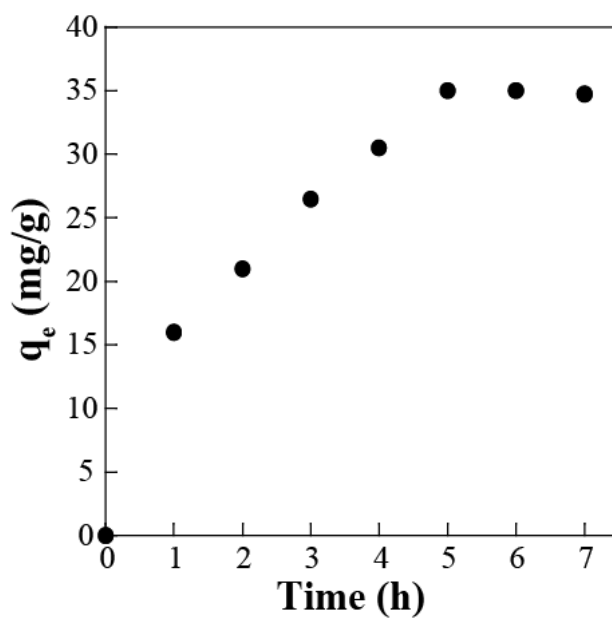

**Figure S4.** Adsorption kinetics with 1 mg/L BSA and 20 g/L malachite NPs at pH ~5.0. The steady state reaches within 5 h.

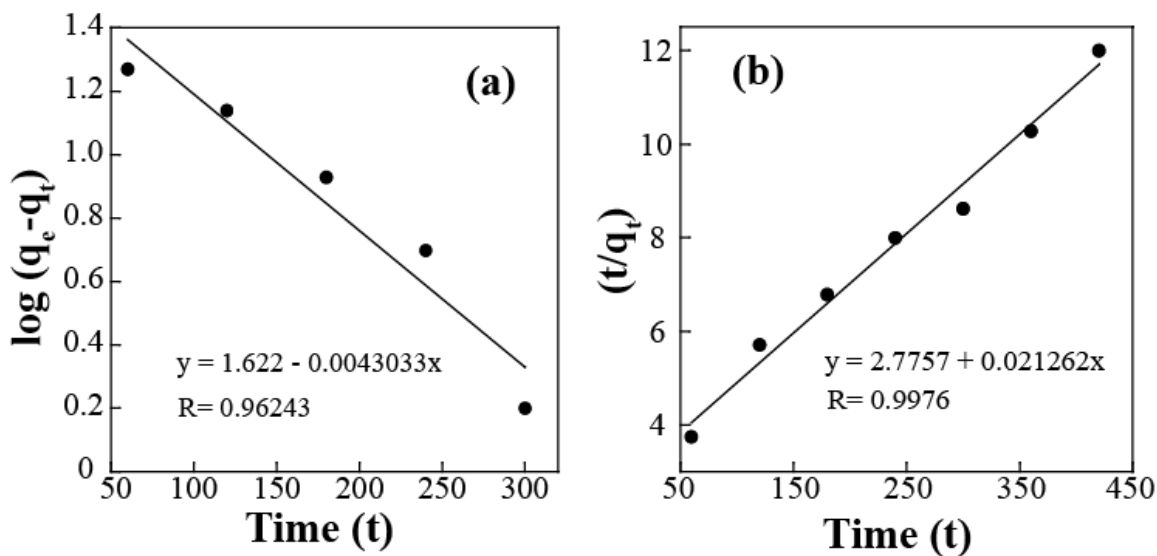

**Figure S5.** (a) Pseudo first order and (b) second order kinetics model of BSA adsorption studies on malachite performed with 1 mg/mL BSA and 20 g/L of malachite at pH ~5.0.

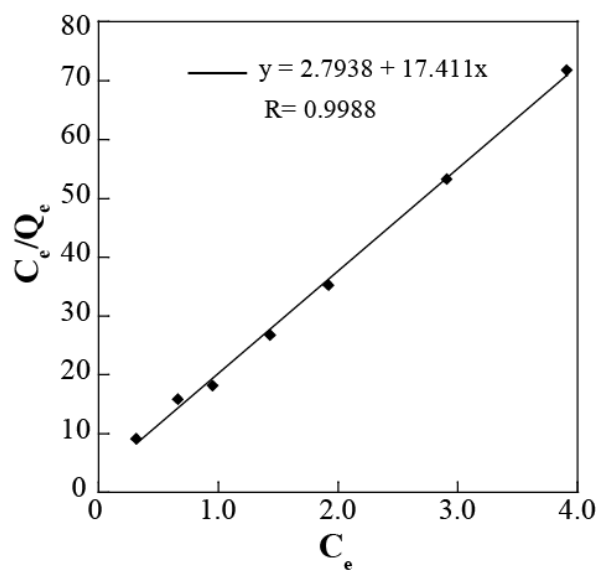

**Figure S4.** Scatchard plot of BSA adsorption on malachite NPs at different protein concentration. Correlation coefficient (R) value of 0.998 implies no significant co-operative effect.

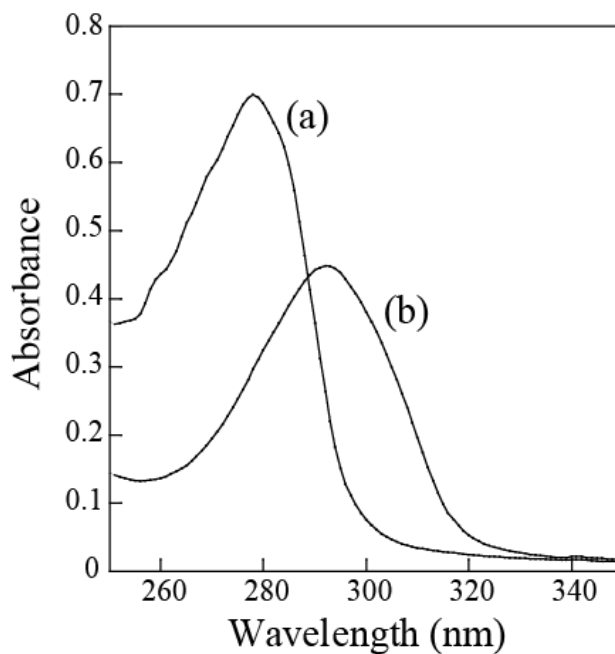

**Figure S5.** UV spectra of BSA in (a) native and (b) after desorption from malachite surface. Desorbed spectra shows a ~10 nm shift which is due to alteration in protein conformation upon adsorption-desorption cycle.

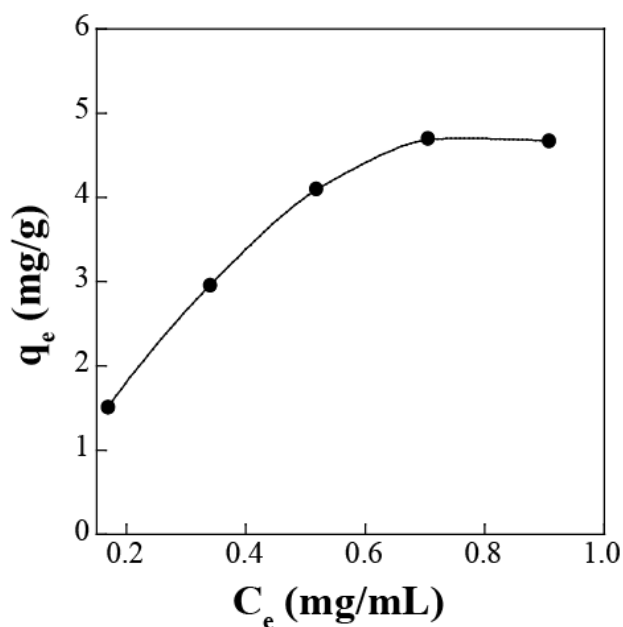

**Figure S6.** Steady state adsorption isotherm of BSA on stearic acid coated malachite NPs at pH ~5.0. Maximum adsorption capacity was very much lower (~5 mg/g) compared to that on bare malachite surface (~50 mg/g).

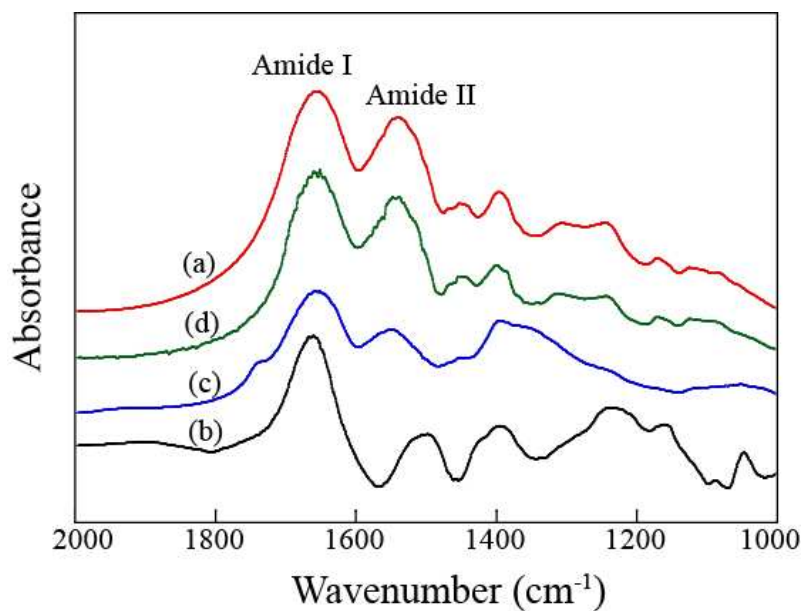

**Figure S7.** FTIR of lyophilized BSA in (a) native, (b) adsorbed (after subtraction of only malachite spectra), (c) desorbed and (d) after interaction with SA-malachite NPs.

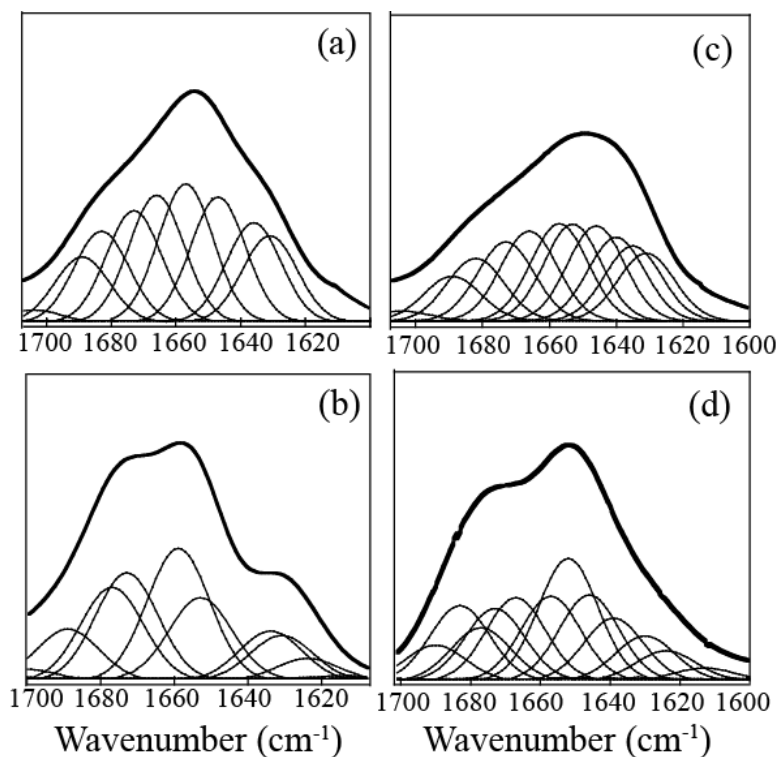

**Figure S8.** Gaussian distribution plot of amide I peak of FT-IR spectra of lyophilized BSA at (a) native, (b) adsorbed, (c) desorbed and (d) after interaction with SA-malachite NPs.

**TABLE S1.** Secondary structural elements of lyophilized BSA at different stages as calculated from Gaussian distribution of amide I peak of FT-IR spectra.

| band position (cm <sup>-1</sup> )<br>Gaussian curve fit | Area (%) of Gaussian bands of BSA |                              |                     |                                     | assignment |
|---------------------------------------------------------|-----------------------------------|------------------------------|---------------------|-------------------------------------|------------|
|                                                         | native<br>state                   | adsorbed on<br>malachite NPs | after<br>desorption | interacted with<br>SA-malachite NPs |            |
| 1704 ± 2                                                | 1 ± 1                             | 2 ± 1                        | 4 ± 1               | 3 ± 1                               | Un-ordered |
| 1689 ± 1                                                | 6 ± 1                             | 7 ± 2                        | 12 ± 2              | 6 ± 1                               | β-sheet    |
| 1683 ± 2                                                | 8 ± 2                             | 15 ± 1                       | 4 ± 1               | 12 ± 2                              | Un-ordered |
| 1673 ± 1                                                | 11 ± 1                            | 17 ± 1                       | 8 ± 2               | 10 ± 1                              | Un-ordered |
| 1666 ± 2                                                | 8 ± 2                             | 21 ± 2                       | 8 ± 1               | 6 ± 2                               | Un-ordered |
| 1656 ± 2                                                | 31 ± 2                            | 15 ± 1                       | 23 ± 2              | 30 ± 1                              | α-helix    |
| 1647 ± 1                                                | 7 ± 1                             | 4 ± 1                        | 8 ± 2               | 8 ± 2                               | Un-ordered |
| 1640 ± 1                                                | 5 ± 1                             | 2 ± 1                        | 11 ± 2              | 6 ± 1                               | β-sheet    |
| 1635 ± 2                                                | 10 ± 1                            | 8 ± 2                        | 9 ± 1               | 6 ± 1                               | Un-ordered |
| 1630 ± 1                                                | 8 ± 2                             | 6 ± 1                        | 9 ± 2               | 9 ± 1                               | β-sheet    |
| 1624 ± 2                                                | 5 ± 1                             | 3 ± 1                        | 4 ± 1               | 4 ± 1                               | Un-ordered |

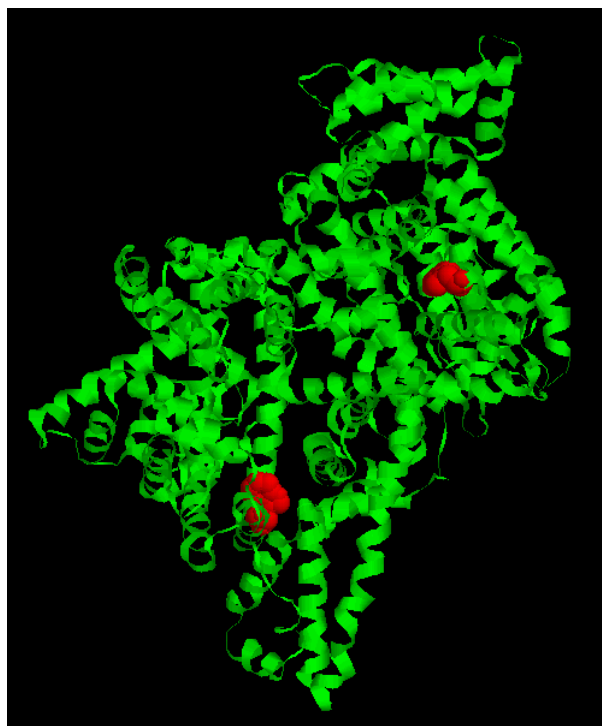

**Figure S9.** PDB structure of ‘BSA-like’ human serum albumin dimer showing the tryptophan residue (red) (PDB ID 1bm0).
